# Supplementary material for: Multi-Task Representation Learning for Renewable-Power Forecasting: A Comparative Analysis of Unified Autoencoder Variants and Task-Embedding Dimensions
Source: MDPI journal article supplement (doi:10.3390/make5030062), 2023-09-20
Supplement: s1 [file s1]

Archive with 1 entries (1 files):
- make-2508907-supplementary.pdf
